**Title- Risk of Corona virus disease 2019 (COVID-19) among spectacles wearing population of Northern India**

**Running head-** Risk of COVID-19 in spectacles wearing population

**Type of study-** Research Analysis

**Authors-** 1. Amit Kumar Saxena

Senior Ophthalmologist, NPCB Center, Kanpur Dehat.

**Corresponding author-** Amit Kumar Saxena

Senior Ophthalmologist, NPCB Center

Department of Health, Kanpur Dehat (UP), India

PIN- 209101

E mail- [dr.amit.opth07@gmail.com](mailto:dr.amit.opth07@gmail.com)

**Author's contribution-** Collection and analysis of data.

**Conflicts of interest-** None of the authors have any proprietary interest related to this submission.

**Financial support-** Nil

This submission has not been published anywhere previously and it is not simultaneously being considered for any other publication.

I understand that this journal charges a publication fee for publication. I confirm that I will pay the amount due whether my manuscript will be accepted for publication.

## **Abstract:-**

**Introduction-** Severe Acute Respiratory Syndrome Corona virus-2 (SARS-CoV-2) spread mainly through respiratory droplets and contact routes. Long term use of spectacles may prevent repeated touching and rubbing of the eyes. Aim of the study is to compare the risk of COVID-19 in long-term spectacles wearers with the risk in persons not using spectacles.

**Objectives-** To know the association between infection with SARSCoV-2 and wearing of spectacles.

**Materials and methods-** In this study, 304 patients of Corona virus disease 2019 (COVID-19) were selected. Their spectacles wearing behaviour were assessed through a questionnaire. Spectacles wearing behaviour of general population were obtained from older studies (for comparison). Risk of COVID-19 was calculated in long term spectacles wearers as well as in persons not using spectacles. Chi- Square test was used for statistical analysis.

**Results-** In this study, total 58 patients showed the behavior of using spectacles continuously during day time and always on outdoor activities. The risk of COVID-19 was found 0.48 in spectacles wearing population as compared to 1.35 in population not using spectacles. The calculated risk ratio was 0.36. It indicates that the risk of COVID-19 was 2- 3 times less in spectacles wearing population than the population not using spectacles. The protective effectiveness of the spectacles was found statistically significant (p- value .00113).

**Conclusion-** The present study showed that the risk of Covid-19 was about 2 - 3 times less in spectacles wearing population than the population not wearing those. The nasolacrimal duct may be a route of virus transmission from conjunctival sac to the nasopharynx.

**Keywords-** COVID-19, Spectacles, Contact route, Conjunctiva, Nasopharynx

## **Introduction-**

Corona virus disease 2019 (COVID-19) is a major disaster to mankind this year. World Health Organization (WHO) declared it a pandemic on March 11, 2020[1]. It is a respiratory and vascular illness caused by a virus named Severe Acute Respiratory Syndrome Corona virus-2 (SARSCoV-2) of beta- corona virus family. It is a single strand RNA enveloped virus [2]. This virus spread from animal to person and person to person through respiratory droplets and contact route [3]. Coughing, sneezing and even talking by an infected person produce large droplets and small aerosols. Droplet transmission is a major route of infection. Droplets can infect a nearby healthy person while aerosols are dispersed in the air and inhalation of this aerosol can infect the person from a distance [4]. When a healthy person comes in close contact with a sick person, his nasal, oral and conjunctival mucosa are exposed to the virus containing respiratory droplets. Some of the studies show that the virus can survive on the surface of different objects for days [5], [6]. Transmission through contact occurs by touching the face, nose, mouth and eyes after direct contact and fomites used by the infected person [7]. This type of transmission in which person's own contaminated hands make subsequent contacts with other body parts and introduce that contaminated material to those body parts, is also known as self-inoculation[8]. It is observed that all the respiratory infection virus can transmit by self-inoculation. An individual has habit of touching his own face on average 23 times in an hour[9] and his eyes on average 3 times per hour[10].

Prevention is always better than cure. Government of India issued an advisory asking every person to wear the face mask in April 2020, during the sudden spike in COVID-19 cases [11]. Centers for Disease Control and Prevention (CDC) also advised people to avoid close contact, maintained hand hygiene and use face mask to reduce the spread of the virus [12].

Wearing the face mask properly by a healthy person can reduce the risk of virus infection by checking the entry of the virus containing droplets and aerosols into the nose and mouth. It also reduces the number of respiratory droplets and aerosols coming from the nose and mouth of the infected person during coughing, sneezing or talking. Face mask also protects us from self-inoculation of the virus. Touching one's nose and mouth is significantly reduced when wearing a face mask properly [13]. But wearing a face mask does not protect the eyes from getting the viral infection through respiratory droplets and self-inoculation. The conjunctival mucosa may be the initial site of infection because it is directly exposed to external pathogens. And angiotensin converting enzyme- 2 (ACE-2) receptors are also present on it [14]. SARSCoV-2 virus enters host cells via the ACE- 2 receptors [15]. Besides nasolacrimal duct may be another route which can transfer the virus from the conjunctival sac to the nasopharynx [16], [17], [18], [19]. The mucosa of the conjunctival sac is in continuation with that of the upper respiratory tract through the nasolacrimal duct. So it is advised that the health care workers should use face shields and goggles to protect their eyes. Wearing the spectacles do not protect the eyes as much as the goggles, yet it may provide some degree of protection.

The prevalence of refractive errors in India is 53.1 % in adults, and 10.2 % of adults have uncorrected refractive errors (not using spectacles) [20]. From the data described above, we can estimate that about 40 % of Indian persons use spectacles. Aim of this study is to compare the risk of COVID-19 in spectacles wearers with the risk in persons not using spectacles. It was an attempt to find out the protective effectiveness of the spectacles against COVID-19, if present.

## **Materials and methods-**

During the month of September 2020, India got its peak in COVID-19 cases with about one lakh cases in a day. This study was conducted from August 26, 2020, to September 8, 2020, in KV Covid Hospital, Kanpur Dehat, a district of Northern India. This cohort study was approved by the ethical committee KV Covid Hospital, Department of Health, Kanpur Dehat and followed all the guidelines of the declaration of Helsinki. There were total 317 patients admitted in that period. Among them, 304 patients were selected for the study after getting informed consent. The inclusion and exclusion criteria are given below-

#### ***Inclusion criteria-***

All the admitted patients of mild COVID-19 ( $SpO_2 > 96\%$ ) whose age was more than 10 years, were included in the study. All the patients were Reverse Transcription Polymerase Chain Reaction (RT-PCR) positive.

#### ***Exclusion criteria-***

Children having age less than 10 years were excluded. Patients having moderate and severe disease ( $SpO_2 < 96\%$ ) were excluded from the study. The patients who did not give consent, were excluded from the study.

To know the spectacles wearing behaviour of the patients, a questionnaire was formulated after through discussion among the members of District Blindness Control Society, Kanpur Dehat. The printed version of the questionnaire was not given to the patients due to Covid protocol. It was fulfilled by a single person during history taking and clinical rounds. For testing its reliability, 20 random patients were selected from the sample and fulfilled the questionnaire two times by the same patients, three days apart. Variables were calculated and reliability was measured using 'test - retest reliability' method. The test was found reliable (coefficient alpha  $> 0.7$ ). Validity could not be assessed properly at Covid Hospital using

Covid protocols. However, possession and usage of the spectacles by the patients might be a validity factor. (Annexure)

## ***Annexure***

***Questionnaire-*** The questionnaire had following points-

1. Do you have proper vision- Yes/ No
2. If not, do you use spectacles- Yes/ No
3. If yes, duration of wearing spectacles-
  - a. All the time ☐
  - b. Only while reading ☐
  - c. Occasionally ☐
4. Do you use sunglasses- Yes/ No
5. If yes, its duration-
  - a. Always when go out ☐
  - b. Occasionally ☐

Data of COVID-19 patients were analysed from the available records for age, gender and spectacles wearing behaviour. Data about spectacles wearing behaviour in general population were not possible during the peak of the epidemic. It was extracted from the earlier studies [20]. From those records, risk of COVID-19 was calculated in long term spectacles wearers as well as in persons not using spectacles. The long-term spectacles wearers were those persons who used spectacles more than 8 hours in a day or using sunglasses always on outdoor activities [21]. Statistical analysis was done using Chi-Square test with p value <.05 as significant. The software used was Statistical Package for Social Sciences (SPSS) version 21.0 for windows.

## Results-

**a. Demographic profiles of the patients-** Data of 304 patients was collected. There were 223 male and 81 female patients. Detailed age and sex wise description of patients was shown in the Table 1.

| Age group (in years) | Male patients | Female patients | Total |
|----------------------|---------------|-----------------|-------|
| 10- 40               | 112           | 43              | 155   |
| 40- 60               | 73            | 36              | 109   |
| >60                  | 28            | 12              | 40    |
| Total                | 213           | 91              | 304   |

Table 1. Demographic profile of the patients included in the study.

The mean age of the patients was  $39.89 \pm 16.43$  years with range 10- 80 years.

**b. Spectacles wearing behaviour of the patients-** After analysis of the questionnaire data, following results were obtained-

1. 236 patients answered that their vision was correct and did not require spectacles. 68 patients admitted that their vision was not proper. In these 68 patient, 60 patients had spectacles and used those.
2. Amongst the above 60 patients, 42 patients responded that they used the spectacles all the time. They were considered as long term spectacles wearers. 18 patients told that they did not use the spectacles all the time. They used those while reading or doing close work. So they were not considered as long term spectacles wearers.
3. 193 patients told that they used sunglasses, in which 16 patients used it always on outdoor activities and 177 patients used it occasionally. In this study, those 16 patients were considered as long term spectacles wearers.

In this study, total 58 (42+16) patients showed the behaviour of using spectacles continuously during day time and always on outdoor activity. This figure was about 19% of persons taken

in the case sample. In other words, 19% population of sample size 304 patients used spectacles most of the day time (>8 hours) and considered as long term spectacles wearers. The spectacles wearing behaviour in general population was described earlier in introduction and methodology section. From the earlier studies, it is estimated that about 40 % of Indian persons use spectacles [20]. In brief, infection with SARSCoV-2 virus and spectacles using behaviour was summarized in table-2.

| RTPCR test for COVID-19                       | Positive (hospitalized patients) | Negative (general population) | Total value |
|-----------------------------------------------|----------------------------------|-------------------------------|-------------|
| Percentage of population using spectacles     | 19                               | 40                            | 59          |
| Percentage of population not using spectacles | 81                               | 60                            | 141         |
| Total value                                   | 100                              | 100                           | 200         |

Table 2. Infection with SARSCoV-2 virus and spectacles using behaviour of persons.

From the data described above, the risk of Covid-19 was calculated in long term spectacles wearing population ( $R_s$ ) as well as in population not using spectacles ( $R_0$ ). Risk ratio (RR) can also be calculated. These are mentioned in table-3.

| Risk  | Formulas                                                                                                                    | Calculations |
|-------|-----------------------------------------------------------------------------------------------------------------------------|--------------|
| $R_s$ | percentage of persons using spectacles in sample cases ÷<br>percentage of persons using spectacles in general<br>population | 19/ 40= 0.48 |



|                         |                                                                                                                                             |                  |
|-------------------------|---------------------------------------------------------------------------------------------------------------------------------------------|------------------|
| <b><math>R_0</math></b> | percentage of persons not using spectacles in sample cases<br><br>÷ percentage of persons not using spectacles in general<br><br>population | 81/ 60= 1.35     |
| <b><math>RR</math></b>  | $R_s / R_0$                                                                                                                                 | 0.48/ 1.35= 0.36 |

Table 3. Risk of Covid-19 in long term spectacles wearing population ( $R_s$ ), in population not using spectacles ( $R_0$ ) and risk ratio (RR) calculations.

Chi-Square test was used to know the association between infection with SARSCoV-2 virus and spectacles wearing behaviour. The association was found significant having p- value .00113.

### Discussion-

To reduce the global burden of COVID-19 cases, we shall have to find out every possible method of virus transmission. We should take all the precautions and measures to reduce its transmission. In this study, risk of the disease in long term spectacles wearers was 0.48 as compared to 1.36 in population not using spectacles. The risk ratio was 0.36 which means that the risk of disease was 2- 3 times less in spectacles wearing population. The study was also found statistically significant having p- value .00113. W Zeng et al. showed that long term wearing of eyeglasses (> 8hours/ day) might reduce the susceptibility to COVID-19 disease [21]. It might be due to less touching and rubbing of eyes while wearing spectacles. The study done by Kwok YLA et al. showed that touching our face is a frequent habit and on average every normal person touches his face 23 times and his eyes about 3 times in an hour[10].

Earlier studies showed the presence of SARSCoV-2 virus RNA in conjunctival sac. The RNA was detected in conjunctival swabs of 24% of patients of COVID-19 in a study conducted by

Arora R et al. [22]. There are some case reports in which conjunctivitis was the only presentation of COVID-19 [23]. Shengjie Li et al. showed that ACE-2 receptors are present on the human conjunctiva, especially on conjunctival epithelial cells. They found that COVID-19 can be transmitted through the conjunctiva [24]. However Lange C et al. gave the opposite concept. They showed that conjunctival ACE-2 receptors have very limited role in transmission of the disease [25]. The study done by JJ Miner et al. in November 2020 showed that SARSCoV-2 virus do not replicate in human corneal explants [26]. They showed that infection of corneal tissue was extremely rare. However nasolacrimal duct is another route which opens the passage of the virus from conjunctival sac to nasopharynx. Some studies asserted that the virus may pass from conjunctiva to nasopharynx through the nasolacrimal duct [16], [17], [18], [19]. So it is advised that the health care workers should use eye safety goggles when coming into contact with patients of COVID-19.

### **Limitations-**

There are some confounding factors in the present study as follow of preventive measures, education status of the patients etc. The uneducated and lower socioeconomic persons are more prone to get the infection. They do not follow the preventive guidelines properly. They also have habit of using spectacles less than the educated persons. The sample size was small. The period of the study was also short. The spectacles wearing behaviour of general population could not be measured during the peak of epidemic. More studies should be done to know the effect of using spectacles on the epidemiology of COVID-19.

### **Conclusion-**

This present study showed that the risk of COVID-19 was 2- 3 times less in spectacles wearing population than the population not using spectacles. Protective role of the spectacles was found statistically significant, if those were used for long period of the day (>8 hours).

Touching and rubbing of the eyes with contaminated hands may be a significant route of infection for SARSCoV-2 virus.

### **Acknowledgement-**

I am very thankful to Dr. A P Verma, Nodal Officer, KV Covid Hospital Kanpur Dehat for helping me in this study, and Department of Ophthalmology, GSVM Medical College, Kanpur for guidance. I am also thankful to the members of District Blindness Control Society, Kanpur Dehat for formulation of the questionnaire.

### **References-**

1. World Health Organization (WHO). WHO Director-General's opening remarks at the media briefing on COVID-19. 2020 Mar 11 [internet]. Geneva: [cited 2020 Oct 30]. Available from:  
<https://www.who.int/director-general/speeches/detail/who-director-general-s-opening-remarks-at-the-media-briefing-on-covid-19---11-march-2020>
2. Zhu N, Zhang D, Wang W, Li X, Yang B, Song J, et al. A Novel Coronavirus from Patients with Pneumonia in China, 2019. N Engl J Med. 2020;382:727-733.  
doi: <https://doi.org/10.1056/NEJMoa2001017>
3. Liu J, Liao X, Qian S, Yuan J, Wang F, Liu Y et al. Community transmission of severe acute respiratory syndrome coronavirus 2, Shenzhen, China, 2020. Emerg Infect Dis. 2020 Jun;26(6):1320-1323.  
doi: <https://doi.org/10.3201/eid2606.200239>

4. Zhang R, Li Y, Zhang AL, Wang Y and Molina MJ. Identifying airborne transmission as the dominant route for the spread of COVID-19. PNAS. 2020 June 30;117(26):14857-14863.  
  
doi: <https://doi.org/10.1073/pnas.2009637117>
5. Doremalen NV, Morris DH, Holbrook MG, Gamble A, Williamson BN, Tamin A, et al. Aerosol and surface stability of SARS-CoV-2 as compared with SARS-CoV-1. N Engl J Med. 2020;382:1564–1567.  
  
doi: <https://doi.org/10.1056/NEJMc2004973>
6. Chin AWH, Chu JTS, Perera MRA, Hui KPY, Yen HL, Chan MCW, et al. Stability of SARS-CoV-2 in different environmental conditions. Lancet. 2020;1:E10.  
  
doi: [https://doi.org/10.1016/S2666-5247\(20\)30003-3](https://doi.org/10.1016/S2666-5247(20)30003-3)
7. Ong SW, Tan YK, Chia PY, Lee TH, Ng OT, Wong MSY, et al. Air, surface, environmental and personal protective equipment contamination by severe acute respiratory syndrome coronavirus 2 (SARSCoV-2) from a symptomatic patient. JAMA. 2020 Apr 28;323(16):1610-1612.  
  
doi: <https://doi.org/10.1001/jama.2020.3227>
8. Nicas M and Best D. A study quantifying the hand-to-face contact rate and its potential application to predicting respiratory tract infection. J Occup Environ Hygiene. 2008;5:347-352.  
  
doi: <https://doi.org/10.1080/15459620802003896>

9. Macias AE, Torre A, Moreno-Espinosa S, Leal PE, Bourlon MT and Ruiz-Palacios GM. Controlling the novel A (H1N1) influenza virus: don't touch your face! Journal of Hospital Infection. 2009 Nov 1;73(3):280-281.  
  
doi: <https://doi.org/10.1016/j.jhin.2009.06.017>
10. Kwok YLA, Gralton J and McLaws M. Face touching: A frequent habit that has implications for hand hygiene. Am J of Infection Control. 2015 Feb 01;43(2):112-114.  
  
doi: <https://doi.org/10.1016/j.ajic.2014.10.015>
11. COVID-19: Government issues advisory asking people to wear 'homemade face covers.' The New Indian Express. 2020 April 04 [internet]. New Delhi: [cited 2020 Oct 30]. Available from:  
  
<https://www.newindianexpress.com/nation/2020/apr/04/covid-19-government-issues-advisory-asking-people-to-wear-homemade-face-covers-2125687.amp>
12. Centers for Disease Control and Prevention (CDC). How to Protect Yourself and Others. Updated 2020 Nov 4. [internet]. Atlanta: [cited 2020 Nov 30]. Available from:  
  
<https://www.cdc.gov/coronavirus/2019-ncov/prevent-getting-sick/prevention.html>
13. Chen Y, Qin G, Chen J, Xu J, Feng D, Wu X, et al. Comparison of Face-Touching Behaviors Before and During the Coronavirus Disease 2019 Pandemic. JAMA Netw Open. 2020;3(7):e2016924.  
  
doi: <https://doi.org/10.1001/jamanetworkopen.2020.16924>
14. Sun CB, Wang YY, Liu G and Liu Z. Role of the Eye in Transmitting Human Coronavirus: What We Know and What We Do Not Know. Front Public Health 2020 Apr 24;8:155.

doi: <https://doi.org/10.3389/fpubh.2020.00155>

15. Ni W, Yang X, Yang D, Bao J, Li R, Xiao Y, et al. Role of angiotensin-converting enzyme 2 (ACE2) in COVID-19. Crit Care. 2020 Jul 13;24:422.

doi: <https://doi.org/10.1186/s13054-020-03120-0>

16. Siedlecki J, Brantl V, Schworm B, Mayer WJ, Gerhardt M, Michalakakis S, et al. COVID-19: ophthalmological aspects of the SARS-CoV 2 global pandemic. Klinische Monatsblätter für Augenheilkunde. 2020;237(5):675-680.

doi: <https://dx.doi.org/10.1055%2Fa-1164-9381>

17. Marra AR, Edmond MB, Popescu SV and Perencevich EN. Examining the need for eye protection for coronavirus disease 2019 (COVID-19) prevention in the community. Infect Control Hosp Epidemiol. 2020 Jun 24;1–2.

doi: <https://dx.doi.org/10.1017%2Fice.2020.314>

18. Qing H, Li Z, Yang Z, Shi M, Huang Z, Song J, et al. The possibility of COVID-19 transmission from eye to nose. Acta Ophthalmologica. 2020;98(3):e388-e388.

doi: <https://doi.org/10.1111/aos.14412>

19. Leilynaz Malekafzali. Can COVID-19 affect the eyes? BCMJ [internet]. 2020 Sep [cited 2020 Oct 30];62(7):232-233. Available from

[https://bcmj.org/articles/can-covid-19-affect-eyes?fbclid=IwAR0HLF5FeeAhn3xJPaNfJZKZKOrXZ3ZiJi3Jzg9ceuUk7p79QCq\\_454-Gg](https://bcmj.org/articles/can-covid-19-affect-eyes?fbclid=IwAR0HLF5FeeAhn3xJPaNfJZKZKOrXZ3ZiJi3Jzg9ceuUk7p79QCq_454-Gg)

20. Sheeladevi S, Seelam B, Nukella PB, Borah RR, Ali R and Keay L. Prevalence of refractive errors, uncorrected refractive error, and presbyopia in adults in India: A systematic review. Indian J Ophthalmology. 2019 May;67(5):583-592.

doi: [https://doi.org/10.4103/ijo.IJO\\_1235\\_18](https://doi.org/10.4103/ijo.IJO_1235_18)

21. Zeng W, Wang X, Li J, Yang Y, Qiu X, Song P, et al. Association of Daily Wear of Eyeglasses With Susceptibility to Coronavirus Disease 2019 Infection. JAMA Ophthalmology. 2020 Sept 16;138(11):1196-1199.  
doi: <https://doi.org/10.1001/jamaophthalmol.2020.3906>
22. Arora R, Goel R, Kumar S, Chhabra M, Saxena S, Manchanda V, et al. Evaluation of SARSCoV-2 in Tears of Patients with Moderate to Severe COVID-19. Ophthalmology, 2020 Aug 31; Forthcoming 2020.  
doi: <https://doi.org/10.1016/j.ophtha.2020.08.029>
23. Ozturker Z K. Conjunctivitis as sole symptom of COVID-19: A case report and review of literature. Eur J Ophthalmol. 2020 Jul 24;2020:1120672120946287.  
doi: <https://doi.org/10.1177/1120672120946287>
24. Li S, Li D, Fang J, Liu Q, Cao W, Sun X, et al. SARS-CoV-2 receptor ACE2 is expressed in human conjunctival tissue, especially in diseased conjunctival tissue. The Ocular Surface. 2021 Jan;19:249-251.  
doi: <https://doi.org/10.1016/j.jtos.2020.09.010>
25. Lange C, Wolf J, Auw Haedrich C, Schlecht A, Boneva S, Lapp T, et al. Expression of the COVID-19 receptor ACE2 in the human conjunctiva. Journal of Medical Virology. 2020 May 06;92(10):2081-2086.  
doi: <https://doi.org/10.1002/jmv.25981>
26. Miner JJ, Platt DJ, Ghaznavi CM, Chandra P, Santeford A, Menos AM, et al. HSV- 1 and Zika Virus but Not SARSCOV-2 Replicate in the Human Cornea and Are Restricted by Corneal Type III Interferon. Cell Reports. 2020 Nov 03;33(5):108339  
doi: <https://doi.org/10.1016/j.celrep.2020.108339>
